# Supplementary material for: Disrupting the Transmembrane Domain Oligomerization of Protein Tyrosine Phosphatase Receptor J Promotes its Activity in Cancer Cells
Source: bioRxiv or medRxiv preprint supplement (doi:10.1101/672147), 2019-10-07
Supplement: Supplementary file [file media-1.pdf]

## SUPPLEMENTARY MATERIAL

### **Disrupting the Transmembrane Domain Oligomerization of Protein Tyrosine Phosphatase Receptor J Promotes its Activity in Cancer Cells**

**Elizabeth Bloch<sup>1¶</sup>, Eden L. Sikorski<sup>1¶</sup>, David Pontoriero<sup>2</sup>, Bryan Berger<sup>2</sup>, Matthew J. Lazzara<sup>2</sup>, and Damien Thévenin<sup>1\*</sup>**

<sup>1</sup>Department of Chemistry, Lehigh University (Bethlehem, PA)

<sup>2</sup>Department of Chemical Engineering, University of Virginia (Charlottesville, VA)

\*To whom correspondence should be addressed: [damien.thevenin@lehigh.edu](mailto:damien.thevenin@lehigh.edu)

¶These authors contributed equally to this work

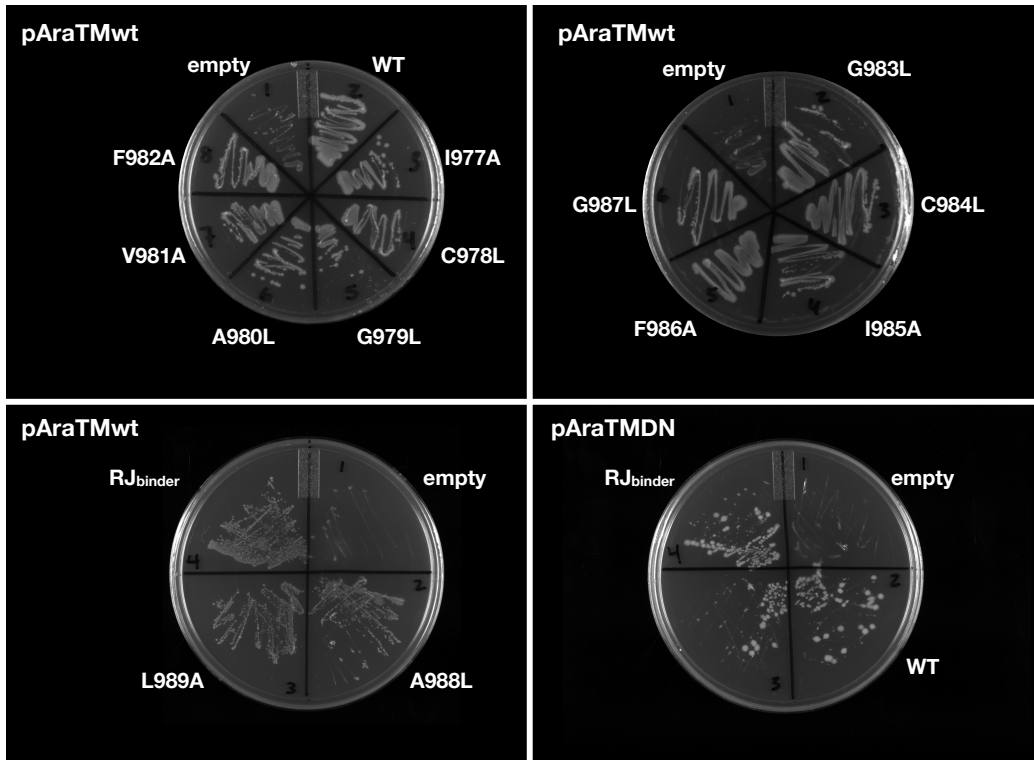

**Figure S1.** Maltose complementation test. The indicated pAraTMwt or pAraTMDN constructs were transformed into the MBP-deficient *E. coli* strain MM39. Saturated culture from each chimera was streaked onto M9 minimal media plates containing maltose. No growth was observed in the empty vectors, in which no AraC or AraC\* fusion is expressed. Recovery of growth was observed for all other fusion constructs, indicating proper orientation in the cell membrane.

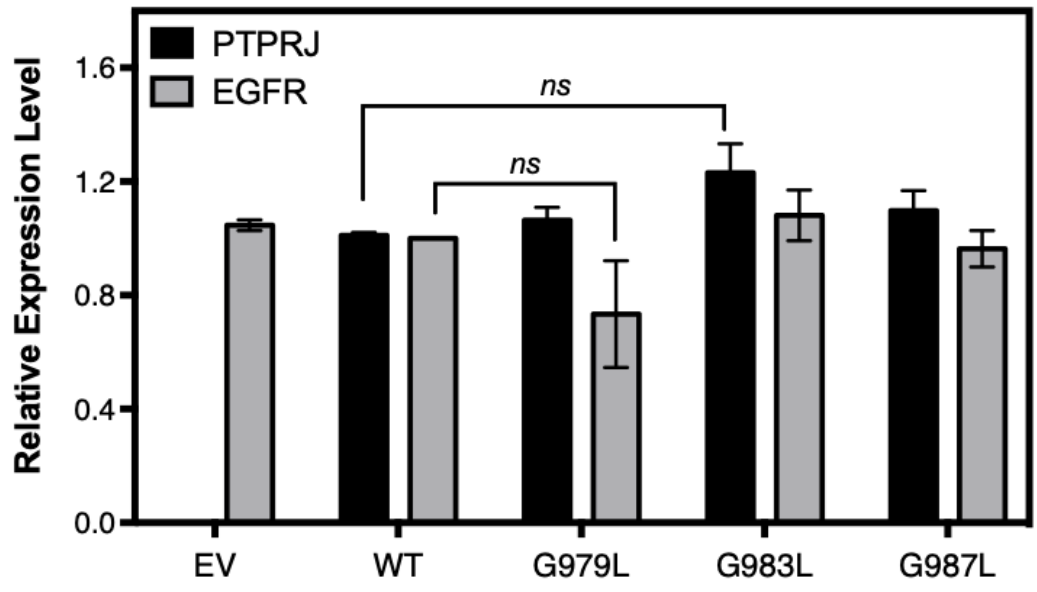

**Figure S2.** Relative expression levels of total PTPRJ and EGFR in UMSCC2 cells normalized to WT. Results are shown as mean  $\pm$  SEM ( $n = 3$ ). Statistical significance was assessed using unpaired  $t$  test (at 95% confidence intervals).

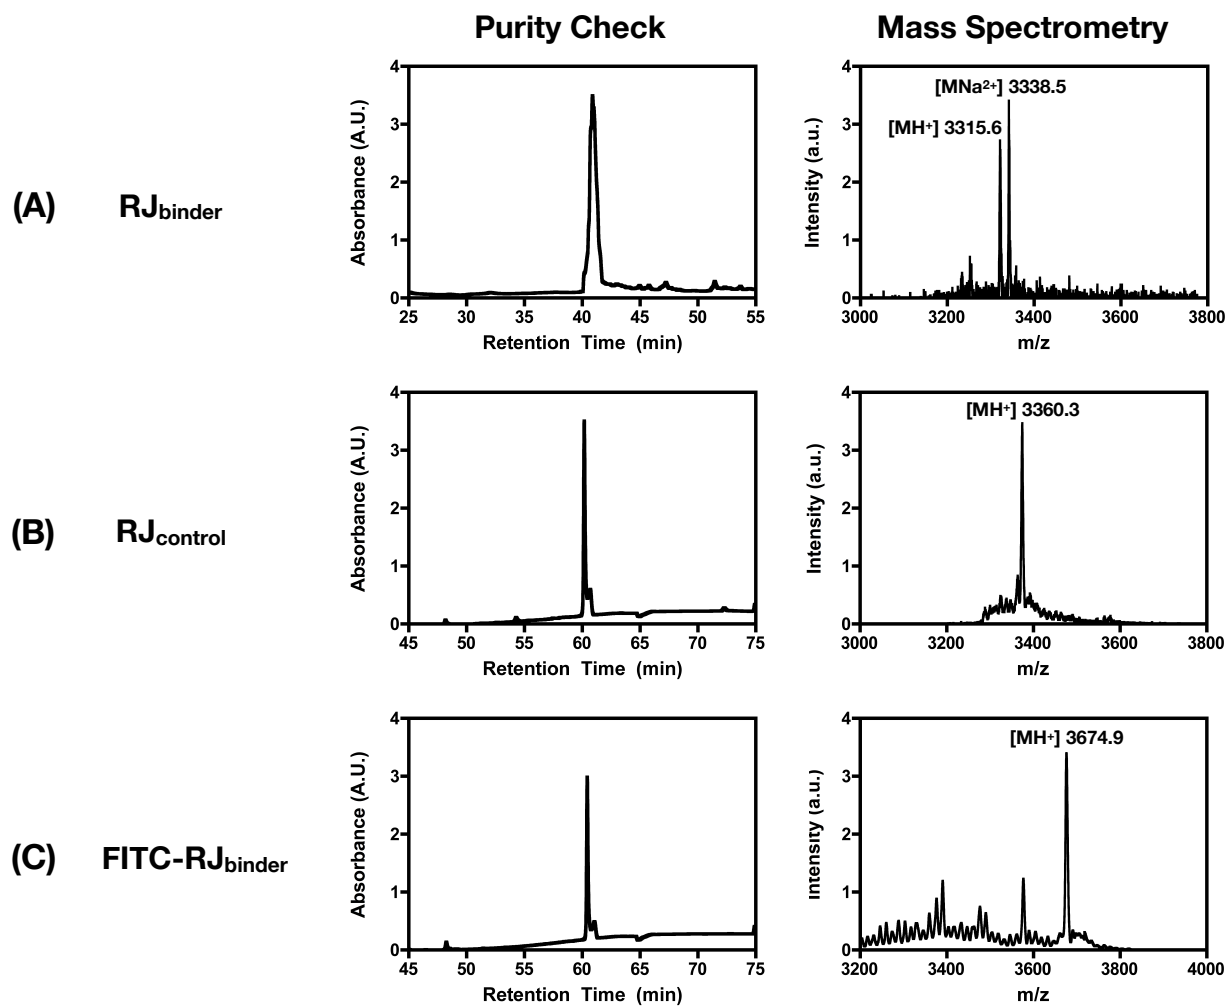

**Figure S3.** Purity check by RP-HPLC and MALDI-TOF MS spectra of synthesized peptides. **(A)**  $RJ_{binder}$ : calculated ( $MH^+$ ) = 3316.1 g/mol, found ( $MH^+$ ) 3315.6 g/mol. **(B)**  $RJ_{control}$ : calculated ( $MH^+$ ) 3358.2, found ( $MH^+$ ) = 3360.3 g/mol. **(C)**  $FITC-RJ_{binder}$ : calculated ( $MH^+$ ) = 3674.5 g/mol, found ( $MH^+$ ) = 3674.9 g/mol.



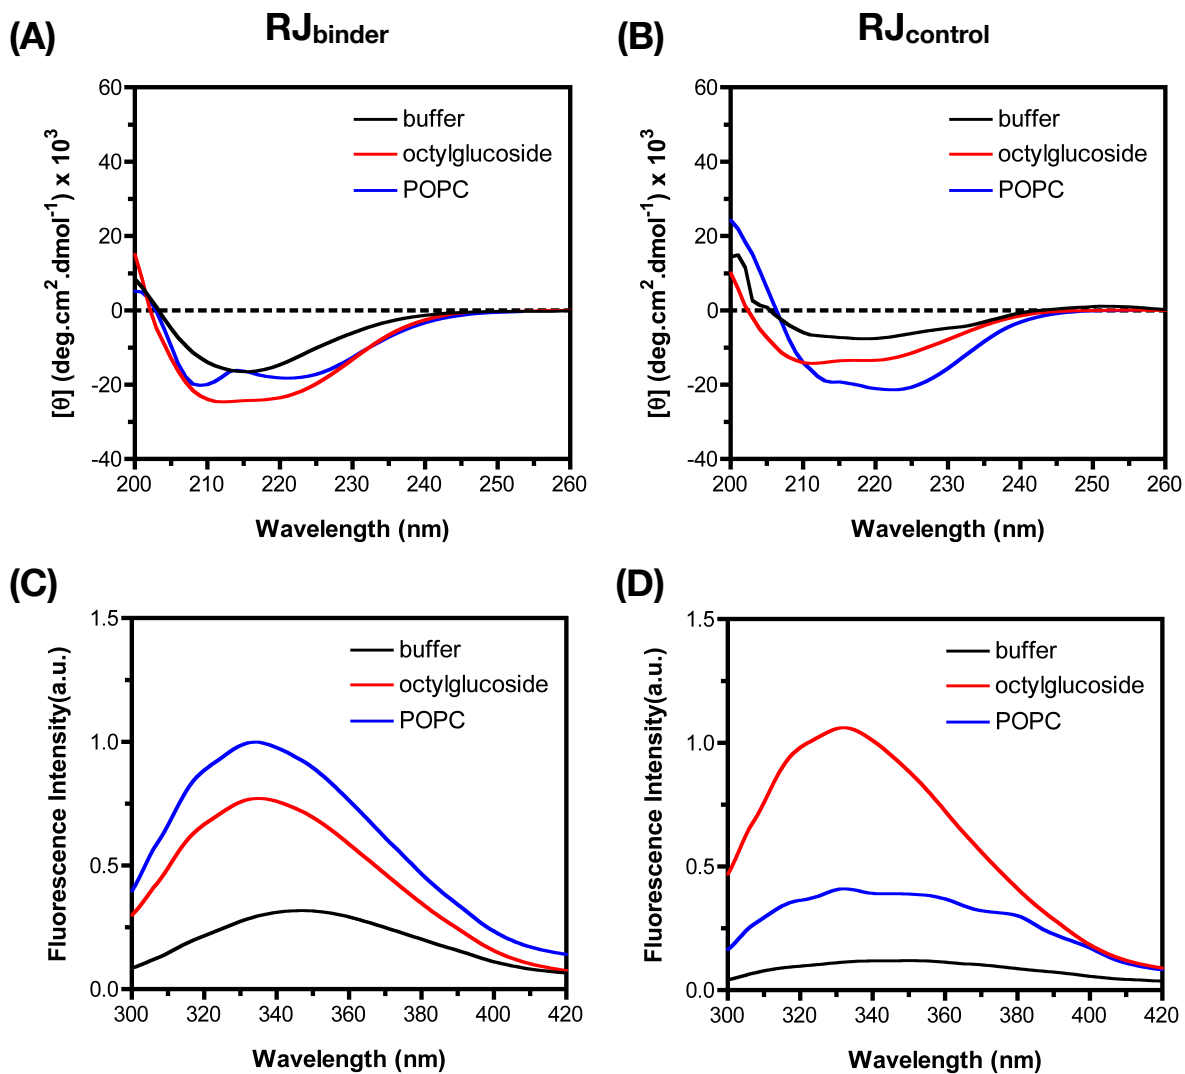

**Figure S4. Interaction of  $RJ_{binder}$  and  $RJ_{control}$  with membrane mimics.** Circular dichroism (A,B) and tryptophan fluorescence emission (C,D) of 10  $\mu$ M  $RJ_{binder}$  and  $RJ_{control}$  in buffer (black), 30 mM n-octylglucoside micelles (red) or large unilamellar POPC lipid vesicles at a 1:300 peptide/lipid ratio (blue).

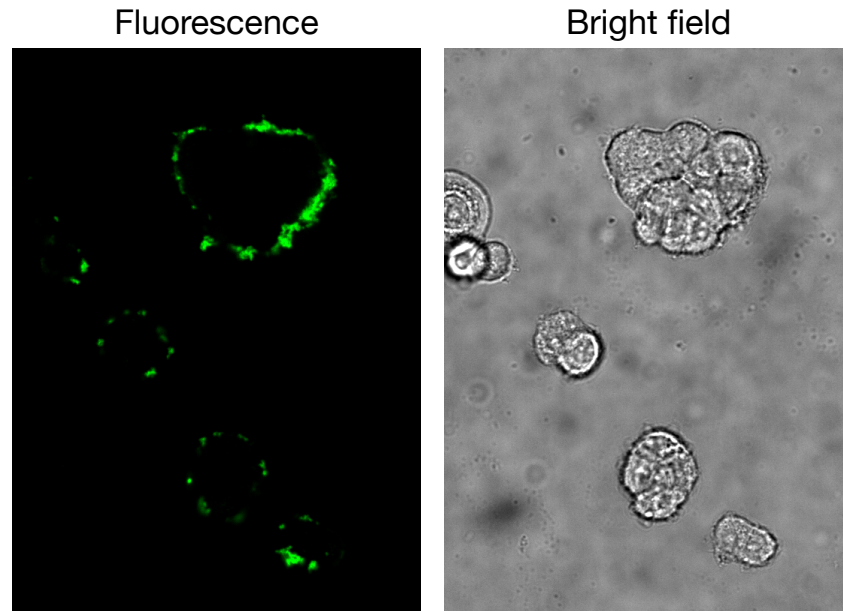

**Figure S5. RJ<sub>binder</sub> partitions into cell membranes.** UMSCC2 cells were treated with 10  $\mu$ M fluorescently labeled RJ<sub>binder</sub> reconstituted in n-octylglucoside micelles for 1 h. Representative fluorescence and bright field images taken from spinning disk confocal microscopy are shown.

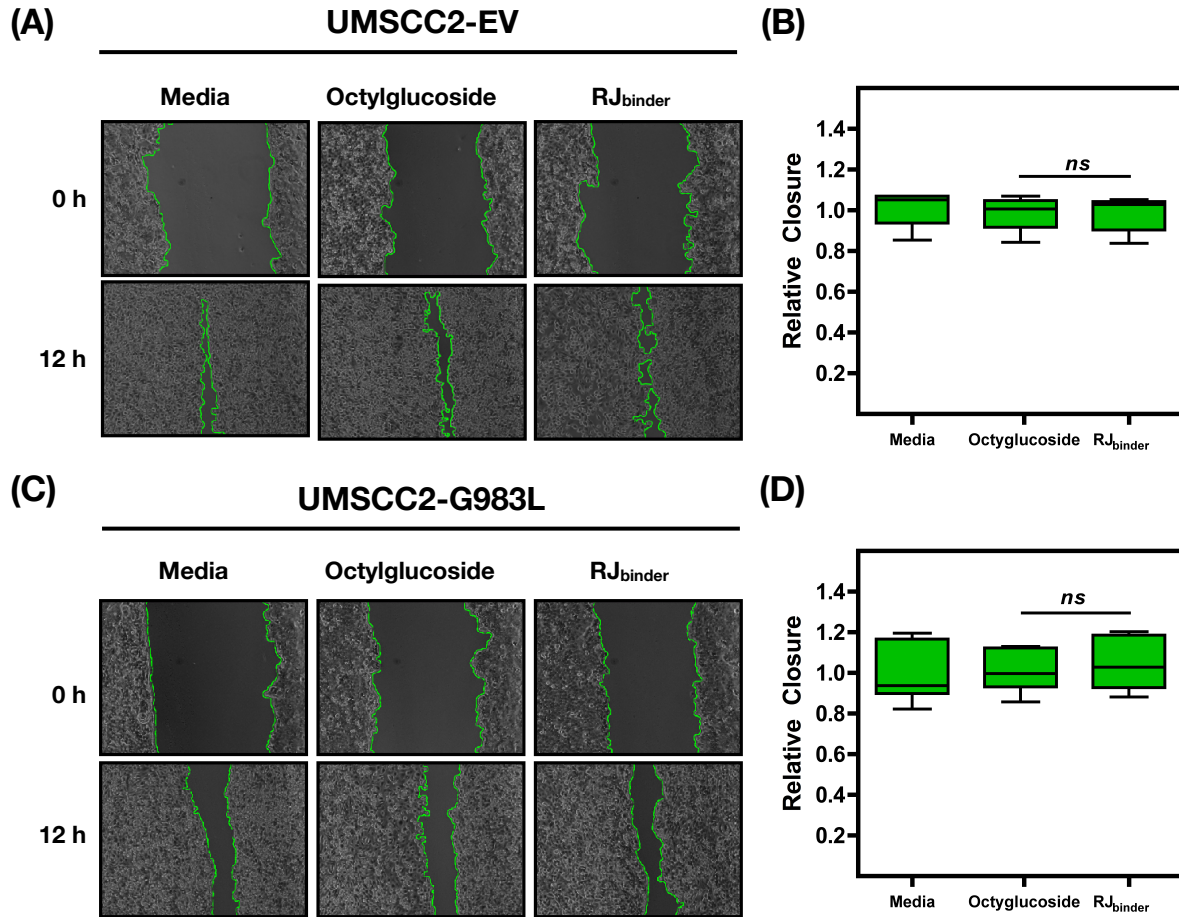

**Figure S6. RJ<sub>binder</sub> has no effect on migration in cells expressing minimal PTPRJ (EV) or the homodimer-disrupting mutant (G983L).** Representative phase contrast images with tracings to identify open scratch areas (A,C) and quantification (B,D) of the effect of RJ<sub>binder</sub> on cells expressing either minimal PTPRJ (A,B) or G983L PTPRJ (C,D). Serum-starved UMSCC2 cells were treated with 10  $\mu$ M RJ<sub>binder</sub> reconstituted in n-octylglucoside micelles for 1 h, scratched (0 h), and incubated media containing EGF (50 ng/mL) for 12 h. Relative closure was quantified by calculating the percent change in area between 0 and 12 h using ImageJ, and then normalized to media containing EGF. (B,D) Results are shown as mean  $\pm$  SEM ( $n = 6-9$ ). Statistical significance was assessed using unpaired  $t$  test (at 95% confidence intervals).

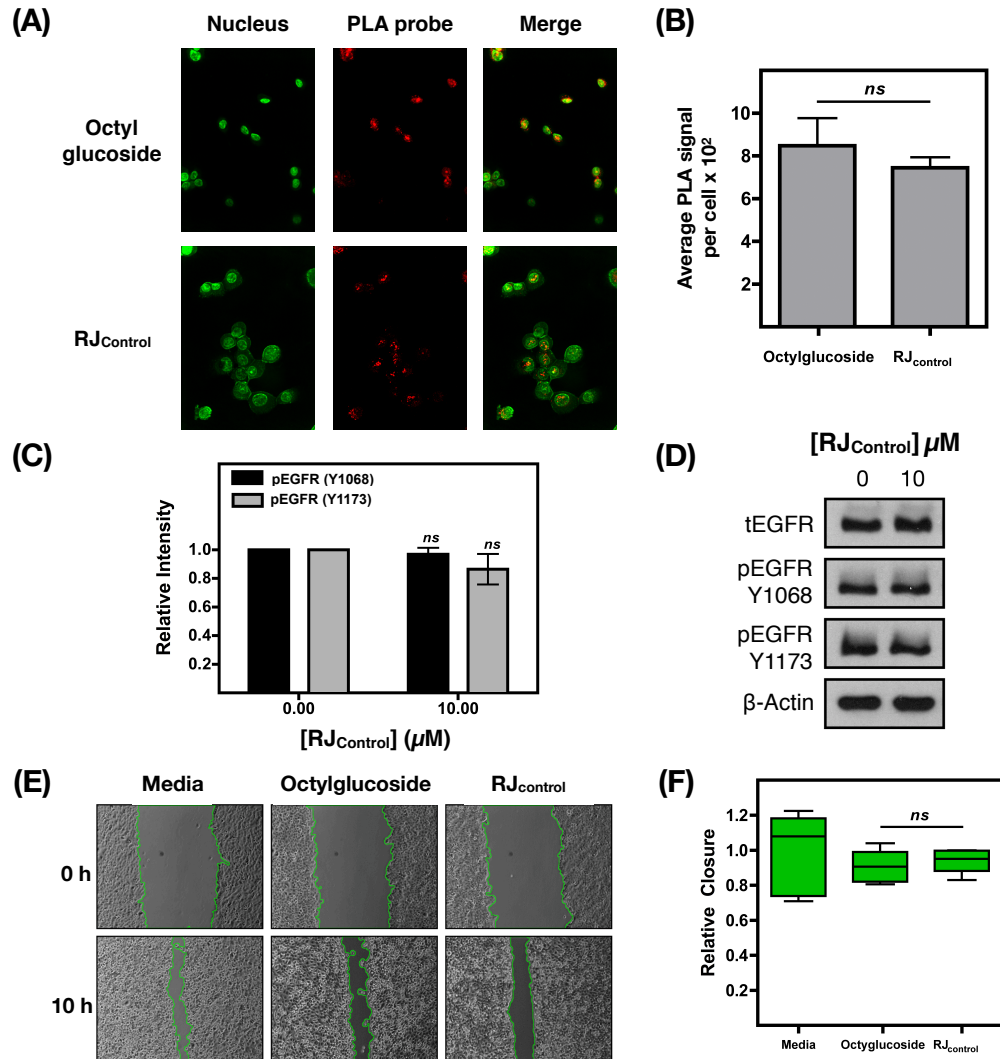

**Figure S7. RJ<sub>control</sub> treatment has no effect on PTPRJ oligomerization, EGFR phosphorylation, or cell migration.** (A,B) Representative confocal microscopy images (A) and quantification (B) quantification of the effect of 10 μM RJ<sub>control</sub> n-octylglucoside micelles on PTPRJ oligomerization using *in situ* PLA. Oligomerization of full-length PTPRJ WT in UMSSC2 cells was measured following treatment with RJ<sub>control</sub> for 1 h using spinning disk confocal microscopy (green: nucleus; red: PLA for PTPRJ self-association). The average PLA signal intensity per cells was determined using BlobFinder. (B) Results are shown as mean ± SEM ( $n > 100$ ). Statistical significance was assessed using unpaired *t* test (at 95% confidence intervals). (C,D) Quantification (C) and representative immunoblots (D) of the effect of RJ<sub>control</sub> on EGFR phosphorylation levels. Serum-starved UMSSC2 cells were treated with 10 μM RJ<sub>control</sub> for 3 h prior to stimulation with EGF. Cell lysates were probed for EGFR and phospho-EGFR (Y1068 and Y1173). The relative (ratio of phosphorylated to total protein) intensities are shown as mean ± SEM ( $n = 3$ ). Statistical significance was assessed using unpaired *t* test (at 95% confidence intervals). (E,F) Representative phase contrast images with tracings to identify open scratch areas (E) and quantification (F) of the effect of RJ<sub>control</sub> on wound closure. Serum-starved UMSSC2 cells were treated with 10 μM RJ<sub>control</sub> or 3 mM n-octylglucoside alone for 1 h, scratched (0 h), and incubated in media with EGF (50 ng/mL) for 10 h. Relative closure was quantified by calculating the percent change in area between 0 and 10 h using ImageJ, and then normalized to media containing EGF. (F) Results are shown as mean ± SEM ( $n = 6-9$ ). Statistical significance was assessed using unpaired *t* test (at 95% confidence intervals).

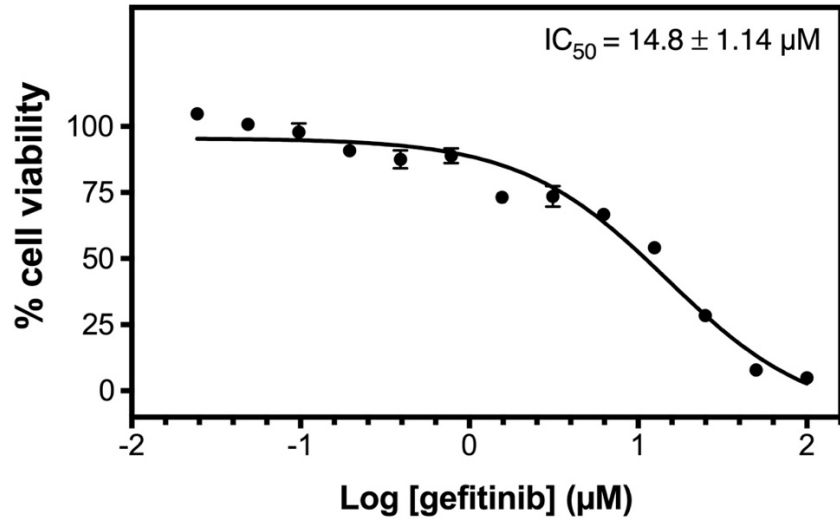

**Figure S8. Sensitivity of UMSCC2 cells expressing WT PTPRJ1 towards gefitinib.** 5,000 cells/well were treated with increasing concentrations of gefitinib in 1% DMSO for 72 hours. Cell viability was determined using the colorimetric MTT assay. Briefly, 10 µL of a 5 mg/mL MTT stock solution was added to the treated cells and incubated for 2 h at 37 °C. The resulting formazan crystals were solubilized in 200 µL DMSO and the absorbance measured at 580 nm using an Infinite 200 PRO microplate reader (Teca). Results are shown as mean ± SEM ( $n = 6$ ). Data were fitted with a sigmoidal dose-response (Prism for Mac, GraphPad, Inc.).
